# Supplementary material for: A simple microplasma reactor paired with indirect ultrasonication for aqueous phase synthesis of cobalt oxide nanoparticles
Source: Royal Society of Chemistry journal article supplement (doi:10.1039/d3na00249g), 2023-01-01
Supplement: d3na00249g1.pdf [file d3na00249g1.pdf]

## Supplementary information

### Simple microplasma reactor paired with indirect ultrasonication for aqueous phase synthesis of cobalt oxide nanoparticles

*Sosiawati Teke<sup>a</sup>, Md. Mokter Hossain<sup>b</sup>, Roshan Mangal Bhattarai<sup>a</sup>, Shirjana Saud<sup>a</sup>, Avik Denra<sup>a</sup>, Mai Cao Hoang Phuong Lan Nguyen<sup>a</sup>, Adnan Ali<sup>a</sup>, Van Toan Nguyen<sup>c</sup>, Young Sun Mok<sup>a,\*</sup>*

<sup>a</sup> Department of Chemical Engineering, Jeju National University, Jeju-63243, Republic of Korea.

<sup>b</sup> Department of Chemical and Biological Engineering, University of Idaho, Moscow-83844, United States.

<sup>c</sup> Faculty of Mechanical Engineering, Le Quy Don Technical University, Vietnam.

Corresponding author: [smokie@jejunu.ac.kr](mailto:smokie@jejunu.ac.kr)

Tel.: +82-64-754-3682; Fax: +82-64-755-3670

## **Characterization of materials**

Absorption spectra were recorded using a Scinco (Mega-2100) double-beam UV-Vis spectrophotometer in the spectral range of 325-700 nm. The microstructures and morphologies of the samples were observed by scanning electron microscopy (FE-SEM) (TESCAN, MIRA3) and transmission electron microscopy (TEM) (Talos F200X G2). The chemical compositions were evaluated by energy-dispersive spectroscopy (TEM-EDS) measurements. The phase composition of the material was identified by X-ray diffraction (XRD) analysis performed using a PAN analytical Empyrean X-ray diffractometer with a Cu K $\alpha$  ( $\lambda = 0.15405$  nm) radiation source and operating at 40 kV, 30 mA, with a scan range ( $2\theta$ ) of  $5^\circ$  to  $90^\circ$ . A surface analysis study using X-ray photoelectron spectroscopy (XPS) was conducted using a Theta Probe anglesolved XPS system (Thermo Fisher Scientific Inc., U.K.) with monochromatic Al K $\alpha$  in the range of 1486.6–154 eV at 15 kV.

A)

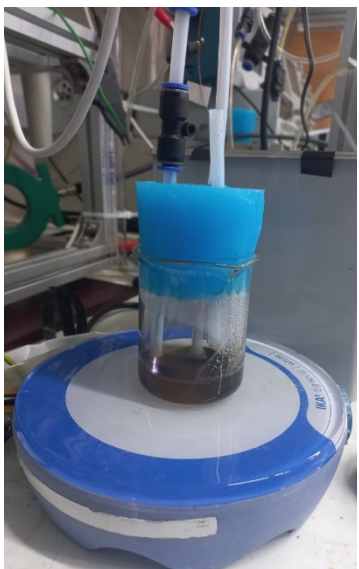

B)

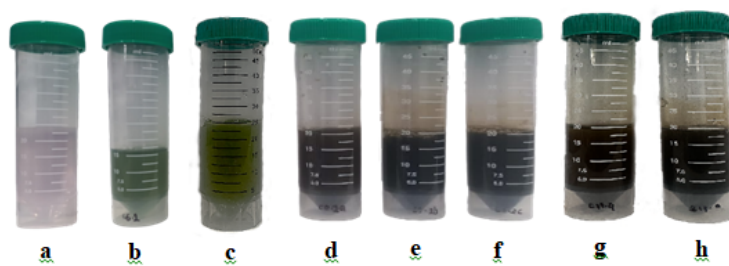

**Figure S1:** A) Precursor treated by microdischarge plasma for 25min. B) Color of precursor before and after reaction, Cobalt 0.01 M before microplasma treatment: (a) pH 7, (b) pH 10, and (c) pH 12 and Cobalt 0.01 M and pH 10 reaction time 25 min.: (d) MPR, (e) MPR-MS, (f) MPR-Son, (g) MPR-urea, and (h) MPR-Suc.

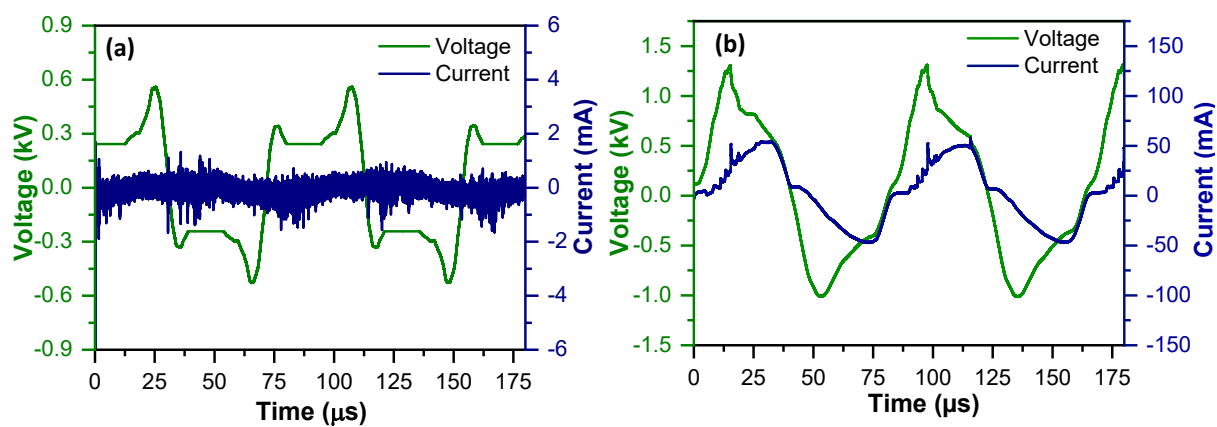

**Figure S2:** Current-voltage waveform: Inlet gas used air :(a) without microplasma formed and (b) with microplasma formed.

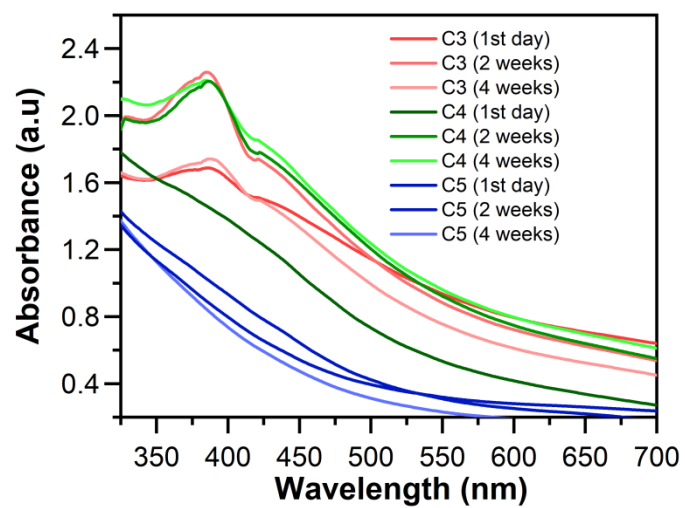

**Figure S3:** UV-Vis spectrum of cobalt oxide with treatment time 25 min from 1<sup>st</sup> day to 4 weeks

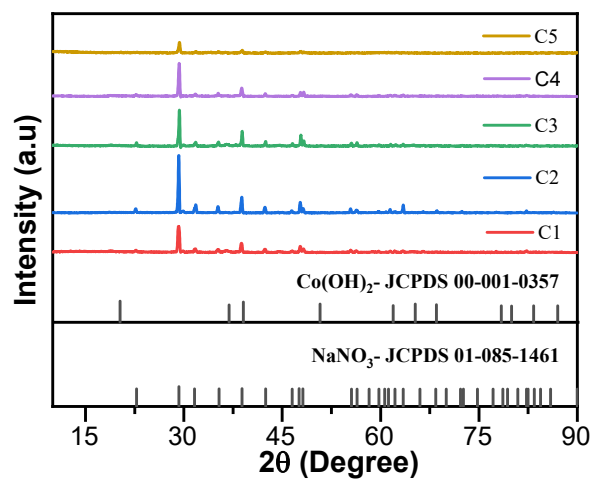

Figure S4. XRD pattern cobalt oxide without calcination
